# Supplementary material
Source: PubMed Central journal article supplement (PMC10198800)

Supplemental Table S1. Cox regression analysis for all-cause dementia stratified by survival time

|                      | <5 years         | 5-10 years       | ≥10 years        |
|----------------------|------------------|------------------|------------------|
| Model 1, # cases     | 735/8,281        | 3,294/14,177     | 3,446/462,389    |
| Model 1, HR (95% CI) | 1.34 (1.14-1.58) | 1.14 (1.05-1.24) | 1.49 (1.37-1.62) |

Supplemental Table S2. Cox regression analysis predicting risk of all-cause, Alzheimer's disease, vascular dementia, frontotemporal dementia from alternative item of loneliness.

|                                                | All-cause<br>dementia |
|------------------------------------------------|-----------------------|
| Model 1, # cases                               | 7,112/468,828         |
| Model 1, HR (95% CI)                           | 1.29 (1.22-1.36)      |
| <u>Sensitivity analyses / Robustness check</u> |                       |
| Model 1.1, # cases                             | -                     |
| Model 1.1, HR (95% CI)                         | -                     |
| Model 1.2, # cases                             | 6,418/460,846         |
| Model 1.2, HR (95% CI)                         | 1.27 (1.20-1.34)      |
| Model 1.3, # cases                             | 6,717/468,828         |
| Model 1.3, HR (95% CI)                         | 1.31 (1.24-1.38)      |
| Model 1.4, # cases                             | 6,982/357,427         |
| Model 1.4, HR (95% CI)                         | 1.28 (1.21-1.35)      |
| <u>Socioeconomic covariates</u>                |                       |
| Model 2, # cases                               | 7,112/468,828         |
| Model 2, HR (95% CI)                           | 1.27 (1.20-1.34)      |
| Model 2.1, # cases                             | 5,357/401,731         |
| Model 2.1, HR (95% CI)                         | 1.19 (1.12-1.27)      |
| <u>Depression and Social Isolation</u>         |                       |
| Model 3, # cases                               | 6,510/442,828         |
| Model 3, HR (95% CI)                           | 1.23 (1.16-1.30)      |
| Model 3.1, # cases                             | 6,510/442,801         |
| Model 3.1, HR (95% CI)                         | 1.19 (1.12-1.26)      |
| <u>Vascular and Behavioral covariates</u>      |                       |
| Model 4, # cases                               | 7,112/468,828         |
| Model 4, HR (95% CI)                           | 1.24 (1.18-1.31)      |
| Model 4.1, # cases                             | 4,696/340,344         |
| Model 4.1, HR (95% CI)                         | 1.24 (1.17-1.33)      |
| <u>APOE ε4 risk allele covariate</u>           |                       |
| Model 5, # cases                               | 5,726/385,481         |
| Model 5, HR (95% CI)                           | 1.26 (1.19-1.33)      |

Notes. Item= How often are you able to confide in someone close to you? Coded 0= at least once per month, 1=less than once per month. Model 1 to Model 1.4 include the covariates age and sex; Model 1.1 excludes cases with more than one type of dementia code (e.g., AD and VD); Model 1.2 excludes incident cases of dementia within 5 years of baseline assessment; Model 1.3 excludes dementia ascertained from death records; Model 1.4 excludes participants younger than age 50 at baseline; Model 2 includes the covariates of Model 1 plus education; Model 2.1 further adds the Townsend deprivation index and household income; Model 3 includes the covariates of Model 2 plus depression; Model 3.1 further adds social isolation; Model 4 includes the covariates of Model 2 plus vascular risk factors (self-reported diabetes, hypertension, stroke, heart attack, ever smoker, BMI > 30); Model 4.1 further add HbA1c, CRP,

LDL, and the sum of minutes performing walking, moderate and vigorous activity. Model 5 is Model 2 with *APOE*  $\epsilon$ 4 risk allele status. HR = Hazard Ratio; CI = Confidence Interval.

Supplemental Figure S1

Figure caption. Kaplan-Meier curve for loneliness and all-cause dementia.

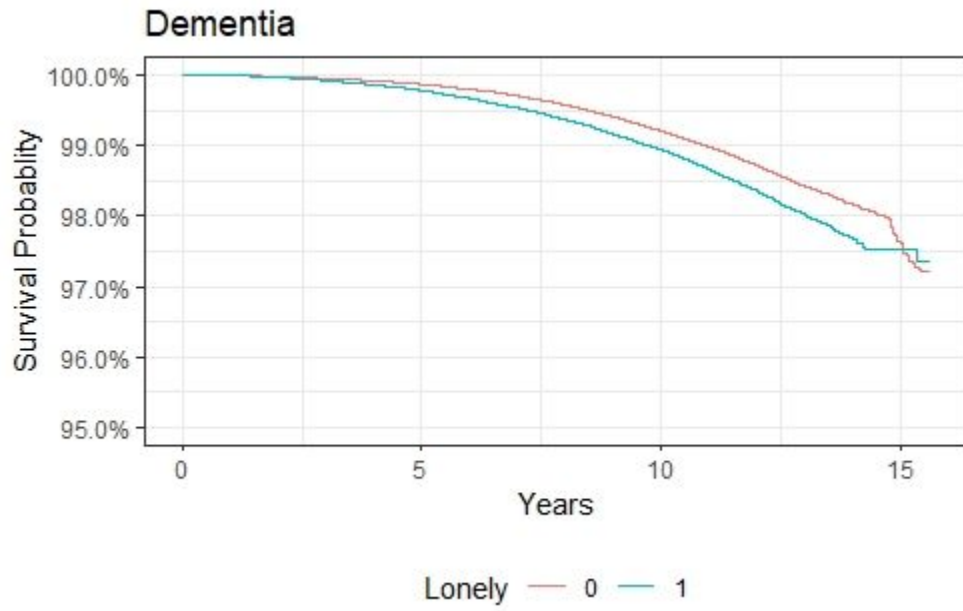

Supplement: NIHMS1843374-supplement-1.pdf [file NIHMS1843374-supplement-1.pdf]
